# Supplementary material for: Seniors managing multiple medications: using mixed methods to view the home care safety lens
Source: Springer Nature journal article supplement (doi:10.1186/s12913-015-1193-5), 2015-06-01
Supplement: MOESM2 [file 9757966]

Additional File 4

Table 4 Samples of interview and focus group questions

| Client & Caregiver Interview questions                                                                                                                                                                                                       |                                                                                                                                                                                                                                                                                                                                                                                                                                                                                                                                                                                                          |
|----------------------------------------------------------------------------------------------------------------------------------------------------------------------------------------------------------------------------------------------|----------------------------------------------------------------------------------------------------------------------------------------------------------------------------------------------------------------------------------------------------------------------------------------------------------------------------------------------------------------------------------------------------------------------------------------------------------------------------------------------------------------------------------------------------------------------------------------------------------|
| <b>1. Would you please tell me about the medications you are taking</b>                                                                                                                                                                      | <ul style="list-style-type: none"> <li>• What are they for? Who helps prepare your medications (i.e., family member, providers, etc.)?</li> <li>• Is there anything special that needs to be done (i.e., crushing, taking with food, etc.)?</li> <li>• Are you taking anything else that is not prescribed (i.e., herbal supplements, vitamins, items from a health food store, etc.)?</li> </ul>                                                                                                                                                                                                        |
| <b>2. Does anyone review your medications on a regular basis with you?</b>                                                                                                                                                                   | <ul style="list-style-type: none"> <li>• Could you please explain, or provide an example?</li> </ul>                                                                                                                                                                                                                                                                                                                                                                                                                                                                                                     |
| <b>3. Do you feel you know what you need to know about the medications you take?</b>                                                                                                                                                         | <ul style="list-style-type: none"> <li>• Could you please explain? Does your home care provider talk to you about your medications?</li> <li>• Do you or your family member read the information pamphlets that come with your prescriptions or medications?</li> </ul>                                                                                                                                                                                                                                                                                                                                  |
| <b>4. What happens if you forget to take a medication?</b>                                                                                                                                                                                   | <ul style="list-style-type: none"> <li>• How do you tell if you have forgotten?</li> <li>• What happens if you take too much of a medication? How do you tell?</li> </ul>                                                                                                                                                                                                                                                                                                                                                                                                                                |
| <b>5. How do you get your prescriptions?</b>                                                                                                                                                                                                 | <ul style="list-style-type: none"> <li>• Who calls them in?</li> <li>• Who brings them home?</li> <li>• How many doctors/nurse practitioners/specialists write prescriptions for you?</li> <li>• Do you get your prescriptions from the same pharmacy or pharmacist each time?</li> <li>• What do you do about refilling your prescriptions?</li> <li>• Do you cut down on your medications to make them last longer?</li> <li>• What do you do with outdated prescriptions?</li> <li>• Have you ever not filled a prescription for financial reasons (i.e., too expensive/could not afford)?</li> </ul> |
| <b>6. Has anyone in your house ever taken your medication, or have you ever taken someone else's medication, either by accident or not? Do you ever share your medications with anyone?</b>                                                  |                                                                                                                                                                                                                                                                                                                                                                                                                                                                                                                                                                                                          |
| <b>7. Do you ever worry about having medications in your home? Please explain.</b>                                                                                                                                                           |                                                                                                                                                                                                                                                                                                                                                                                                                                                                                                                                                                                                          |
| <b>8. What kind of strategies or tricks do you use to remember to take your medication or to remember something important about a medication? Do you use any kind of container to sort your pills in? Tell me about it and how it works.</b> |                                                                                                                                                                                                                                                                                                                                                                                                                                                                                                                                                                                                          |
| Focus Group Questions                                                                                                                                                                                                                        |                                                                                                                                                                                                                                                                                                                                                                                                                                                                                                                                                                                                          |
| <b>1. Would you please describe what you perceive to be the medication management issues that your clients face?</b>                                                                                                                         |                                                                                                                                                                                                                                                                                                                                                                                                                                                                                                                                                                                                          |
| <b>2. With your clients, are there any particular medications that concern you? Please explain, or provide an example.</b>                                                                                                                   |                                                                                                                                                                                                                                                                                                                                                                                                                                                                                                                                                                                                          |
| <b>3. Do you ever get the sense that your clients are not using their medications as instructed</b>                                                                                                                                          |                                                                                                                                                                                                                                                                                                                                                                                                                                                                                                                                                                                                          |
| <b>4. Can you tell me what major medication changes you have witnessed in homecare in the past 5 years?</b>                                                                                                                                  |                                                                                                                                                                                                                                                                                                                                                                                                                                                                                                                                                                                                          |
| <b>5. Do you think there are factors in your clients' homes that facilitate the management of their medications (i.e., finances, hygiene, family support, neighbourhood, etc.)?</b>                                                          |                                                                                                                                                                                                                                                                                                                                                                                                                                                                                                                                                                                                          |
| <b>6. What particular situations in your clients' homes highlight risks or challenges for medication management?</b>                                                                                                                         |                                                                                                                                                                                                                                                                                                                                                                                                                                                                                                                                                                                                          |
| <b>7. Please describe for me how you approach medication management with your homecare clients and their family members/caregivers?</b>                                                                                                      |                                                                                                                                                                                                                                                                                                                                                                                                                                                                                                                                                                                                          |
| <b>8. What do you think are realistic expectations for your clients and their family members when it comes to medication management at home?</b>                                                                                             |                                                                                                                                                                                                                                                                                                                                                                                                                                                                                                                                                                                                          |
| <b>9. What factors within your home care organization/work environment either support or hinder your ability to help your clients manage their medications?</b>                                                                              |                                                                                                                                                                                                                                                                                                                                                                                                                                                                                                                                                                                                          |
